# Unbiased Strain-Typing of Arbovirus Directly from Mosquitoes Using Nanopore Sequencing: A Field-forward Biosurveillance Protocol

Joseph A. Russell<sup>1</sup>, Brittany Campos<sup>2</sup>, Jennifer Stone<sup>2</sup>,  
Erik M. Blosser<sup>3</sup>, Nathan Burkett-Cadena<sup>3</sup>, Jonathan Jacobs<sup>1</sup>

1. MRIGlobal, 65 West Watkins Mill Road, Gaithersburg, MD, USA 20878

2. MRIGlobal, 1470 Treeland Blvd. SE, Palm Bay, FL, USA 32909

3. University of Florida - Florida Medical Entomology Laboratory, 200 9<sup>th</sup> St. SE, Vero Beach, FL, USA 32962

## ABSTRACT

The future of infectious disease surveillance and outbreak response is trending towards smaller hand-held solutions for point-of-need pathogen detection.<sup>1-4</sup> Although recent advances have paved the way for these technologies to include sequencing of pathogens directly from clinical samples, the ability to carry out unbiased sequencing for pathogen discovery and subtyping directly from environmental samples has yet to be demonstrated with hand-held platforms.<sup>5</sup> Products such as the two3 qPCR system from Biomeme Inc., as well as the MinION from Oxford Nanopore Technologies, have generated renewed prospects for point-of-need diagnostics and near real-time environmental testing and characterization of viral and microbial pathogens. Here, samples of *Culex cedecei* mosquitoes collected in Southern Florida, USA were tested for Venezuelan Equine Encephalitis Virus (VEEV), a previously-weaponized arthropod-borne RNA-virus capable of causing acute and fatal encephalitis in animal and human hosts. A single 20-mosquito pool tested positive for VEEV by real-time reverse transcription quantitative PCR (RT-qPCR) on the Biomeme two3. The virus-positive sample was then subjected to unbiased metatranscriptome sequencing on the MinION and determined to contain Everglades Virus (EVEV), a strain of VEEV transmitted exclusively by *Culex cedecei* in South Florida. The result was confirmed on “gold standard” thermocyclers and sequencing machines, and comparison to nanopore results is discussed. Our results demonstrate, for the first time, the use of unbiased sequence-based detection and subtyping of a high-consequence biothreat pathogen directly from an environmental sample using field-forward hardware and protocols. The further development and validation of methods designed for field-based diagnostic metagenomics and pathogen discovery, such as those suitable for use in mobile “pocket laboratories”, will address a growing demand for public health teams to carry out their mission where it is most urgent: at the point-of-need.<sup>6</sup>

36

## 37 INTRODUCTION

38 With increasing accessibility of metagenomics- and metatranscriptomics-based analyses (meta-  
39 omics), clinicians and researchers have begun to embrace the technology as a means of detection  
40 for unknown etiological agents of disease.<sup>5,7-10</sup> In addition, metagenomics has an emerging role  
41 in environmental biosurveillance across multiple mission contexts including bioterrorism  
42 defense<sup>11</sup>, epidemiological public health<sup>12-14</sup>, water-quality monitoring<sup>15</sup>, and agriculture/food  
43 safety<sup>16-18</sup>. In comparison to PCR-based amplicon assays, metagenomics has the added value of  
44 not requiring *a priori* knowledge of a target (i.e., unbiased), delivers functional genomic  
45 information of constituent organisms in a sample (in addition to detection), and provides an  
46 estimate of their relative abundance. However, the benefits of this information are inextricably  
47 dependent on the quality of sample extraction and sequencing reads, the depth of sequencing and  
48 titer-level of the etiological agent, the comprehensiveness of reference databases, and the power  
49 and suitability of back-end computational equipment and bioinformatics analysis. Additionally,  
50 metagenomic sequencing on second-generation sequencing technology typically requires more  
51 than a 24 hour time investment on non-portable machines. Consequently, field-forward  
52 biosurveillance has been limited to primarily PCR-based assays<sup>19-21</sup> or antibody hybridization  
53 technologies<sup>22-25</sup>, which have been the first molecular biology hardware to reach a portable,  
54 hand-held form factor.

55

56 Recent development in nanopore technology, pioneered by Oxford Nanopore Technologies, Inc.  
57 (ONT) with their MinION sequencing device, has opened the possibility of bringing the power  
58 of metagenomics to virtually any environment in the world. The MinION is a pocket-sized,  
59 USB-powered nanopore sequencing platform, weighing less than 100 grams, yet capable of up to  
60 20 GB of ultra-long read (>100kb) sequence data.<sup>26,27</sup> The device's ultra-portability has been  
61 leveraged to perform in-field metagenomic characterization of environments ranging from the  
62 deep subsurface<sup>28</sup> to the Antarctic Dry Valleys.<sup>29</sup> But perhaps the most compelling application of  
63 the MinION platform is the improvement of pathogen surveillance and diagnostics, and  
64 subsequently, health outcomes, for the world's most disadvantaged populations. The small  
65 footprint of the MinION, and other hand-held molecular biology hardware, is particularly  
66 important for austere settings with limited access to the critical infrastructure often required for

67 traditional diagnostics and biosurveillance assays. Routine, point-of-sampling detection,  
68 phylogeny, and genomic characterization of microbial and viral pathogens from clinical *and*  
69 environmental samples stands to fundamentally change public health practices.<sup>30–33</sup> Critically,  
70 nanopore sequencing has the added benefit of real-time analysis<sup>34</sup>, allowing sample-to-answer  
71 intervals that match clinically relevant timeframes. Recent work has demonstrated the efficacy of  
72 nanopore sequencing in RNA-based metatranscriptomic detection of viral pathogens from human  
73 blood samples.<sup>35,36</sup> More recently, single-nucleotide polymorphism (SNP) detection was  
74 demonstrated on the MinION, using PCR amplicons of short tandem repeats, for the purposes of  
75 forensic genotyping.<sup>37</sup> During the Zika Virus (ZIKV) outbreak of 2015-2016 in Brazil, several  
76 groups used nanopore sequencing of RT-qPCR amplicons from mosquito samples to track  
77 incidence of ZIKV infection and study ZIKV vector dynamics.<sup>38,39</sup> And recently, an Australian  
78 group demonstrated the use of nanopore sequencing for whole genome sequencing of Ross River  
79 Virus, directly from a single mosquito under laboratory control conditions.<sup>40</sup> However, to date,  
80 there have been no reports of unbiased (non-PCR) strain-level detection of specific organisms-  
81 of-interest directly from environmental sample matrices (e.g., non-clinical, non-sterile, non-  
82 laboratory derived) using nanopore sequencing. This is likely due to the lower sequencing depth  
83 of nanopore data relative to second-generation sequencing machines, and subsequent detection of  
84 predominantly host genomic material. Over-coming this challenge will enable genome-based  
85 biosurveillance without the constraint of PCR primer design and optimization. This would be  
86 particularly useful for monitoring arbovirus and other viral hemorrhagic fever (VHF) vectors in  
87 hot-spot regions throughout the world where frequent epizootic events threaten the health of  
88 human populations. Often, the pathogens responsible for these events are RNA viruses with  
89 small genomes and high mutation rates, rendering the maintenance of high-fidelity primer sets an  
90 ongoing challenge.

91  
92 An example of such a pathogen can be found in the Americas. Venezuelan Equine Encephalitis  
93 Virus (VEEV) is a positive-sense single-stranded RNA virus with an approximately 11.4  
94 kilobase (KB) genome. An important human and equine pathogen that has previously been  
95 weaponized, VEEV is categorized as an overlap Select Agent by the U.S. government due to its  
96 pathogenicity to both humans and livestock. VEEV is responsible for the most persistent  
97 recurrent outbreaks of New World alphaviruses in the *Togaviridae* family<sup>41</sup>. In humans, VEEV

98 causes a non-specific febrile illness, with onset of symptoms (fever/chills, malaise, tachycardia)  
99 after a 2 to 5-day incubation period. More severe cases (<1% in humans) will result in  
100 encephalitis, and eventually, death 5 to 10 days after infection<sup>42</sup>. It has been determined that  
101 some enzootic equine-avirulent VEEV strains can alter their serotype, and range of both  
102 mosquito vector and vertebrate host, through mutations in the genes encoding the E2 envelope  
103 glycoprotein<sup>43</sup>. Adaptation to equines results in extremely high viremia ( $>10^7$  PFU/ml), leading  
104 to a greater chance of human disease, and highlighting the role of genome-based strain tracking  
105 for public health purposes. An enzootic, sylvatic strain of VEEV (subtype II) circulates in and  
106 around the Everglades region of Southern Florida. Commonly known as Everglades virus  
107 (EVEV), this VEEV subtype is exclusively transmitted by the mosquito species *Culex*  
108 (*Melanoconion*) *cedeciei*, with cotton rats and cotton mice as its primary vertebrate host.<sup>41,44,45</sup>  
109 Surveys in the 1960's and 1970's indicated high seroprevalence of EVEV antibodies in humans  
110 residing in Southern Florida (>50% amongst Seminole Native Americans living north of  
111 Everglades National Park)<sup>46-48</sup>, and it has been suggested that EVEV may be an important,  
112 unrecognized cause of human illness in the region.<sup>44</sup>

113

114 In this study, we successfully demonstrate field-ready protocols for sample collection, RNA  
115 extraction, reverse transcription quantitative PCR amplification, eukaryote host genome  
116 depletion, and nanopore sequencing of a mosquito sample metatranscriptome for the purposes of  
117 arbovirus biosurveillance (**Figure 1**). We report the first use of nanopore sequencing to detect,  
118 and strain-type, an arbovirus directly from field-trapped mosquitoes using a metatranscriptome  
119 approach. The EVEV-positive sample was processed using current “gold standard” platforms  
120 (e.g., CFX-96, Illumina MiSeq) to benchmark differences in results with more conventional  
121 methods. This work demonstrates the practical utility of field-able, hand-held thermocyclers and  
122 nanopore sequencing devices for unbiased strain-level detection of high-titer arboviruses from  
123 complex, environmental sample matrices.

124

## 125 **METHODS**

### 126 ***Sample Collection***

127 Mosquito traps (CO<sub>2</sub>/light-baited) were set for overnight collection near carbonate dissolution  
128 pools in a forested environment, adjacent to Canal 111E in Homestead, FL, USA, on October 17<sup>th</sup>,

129 2016. The first clinical case of Everglades virus in humans was likely acquired while fishing along  
130 C-111 canal.<sup>49</sup> The sampling site was located at 25.4078, -80.5237, approximately 3.8 miles from  
131 the Ingraham Highway entrance to Everglades National Park, FL, USA. Several thousand  
132 mosquitoes were collected. Female *Culex cedecei* individuals were visually sorted and separated  
133 via light microscopy inspection into their own sample pools of 20 individuals per 1.5 ml Eppendorf  
134 tubes. Twenty-five (25) sample pools were sorted, for a total of 500 female *Culex cedecei*  
135 mosquitoes.

136

### 137 ***Sample Extraction***

138 Bulk nucleic acids were extracted from each mosquito pool individually using the Bulk Nucleic  
139 Acids Field Extraction kit from Biomeme, Inc. (Philadelphia, PA, USA). The manufacturer's  
140 protocol was followed, with slight modifications. Each 20-mosquito pool was mashed in 1.5 ml  
141 tube with kit-provided pestle for 1 minute. 50 µl of Biomeme Lysis Buffer (BLB) was added to  
142 the tube and mashing continued for an additional minute. 450 µl of BLB was added and mashing  
143 continued for an additional 30 seconds. The tube was then vortexed for 1 minute, then  
144 centrifuged for 1 minute at 5,000 x g to pellet coarse debris. Subsequently, 500 µl of supernatant  
145 was transferred to 1000 µl aliquot of BLB. The supernatant/BLB mix was briefly vortexed to  
146 mix. The Biomeme syringe extraction column was assembled and the entire supernatant/BLB  
147 mix was drawn up through the column, and then expelled slowly three times. Next, the entire  
148 volume of a 500 µl aliquot of Biomeme Protein Wash solution (BPW) was drawn up through the  
149 column and expelled slowly. Then, the entire volume of a 750 µl aliquot of Biomeme Wash  
150 Buffer (BWB) was drawn up through the column and expelled slowly. After expelling the BWB,  
151 the column was pumped continuously (air-dried) without any reagents until no buffer was  
152 spraying from the tip into the collection vial and there were minimal droplets in the column's  
153 tubing. Finally, 200 µl of Biomeme Elution Buffer (BEB) was drawn into the column and  
154 allowed to incubate for 1 minute at room temperature. The BEB containing eluted total nucleic  
155 acids (TNA) was then expelled into a fresh 1.5 ml tube.

156

### 157 ***RT-qPCR***

158 Each mosquito pool RNA extract was queried with a quantitative real-time reverse transcription  
159 PCR assay specific for Venezuelan Equine Encephalitis Virus (VEEV), using the SuperScript™

160 III Platinum<sup>®</sup> One-Step Quantitative RT-PCR System from Invitrogen (Waltham, MA, USA).  
161 The master mix contained, per 25 µl reaction; 5.25 µl dH<sub>2</sub>O, 12.5 µl 2X reaction mix, 0.5 µl  
162 RNaseOUT<sup>™</sup> ribonuclease inhibitor, 0.5 µl Superscript III<sup>™</sup> RT/Platinum<sup>®</sup> Taq polymerase, 0.5  
163 µl VEEV forward primer, 0.5 µl VEEV reverse primer, and 0.25 µl of VEEV taq-man probe. 5  
164 µl sample RNA was added to each reaction. The RT-qPCR reactions for all 25 samples, plus a  
165 positive control and a no-template negative control, were run on both the Biomeme two3 hand-  
166 held qPCR machine and the BioRad CFX96 Touch<sup>™</sup> Real-time PCR detection system with the  
167 following cycling conditions; 50°C for 15 minutes, 95°C for 2 minutes, then 50 cycles of 95°C  
168 for 15 seconds and 60°C for 1 minute. A single mosquito pool (sample 4.1) was positive for  
169 VEEV on both the Biomeme two3 machine and the CFX96. Primer and probe sequences  
170 available upon request.

171

### 172 ***Generation of Metatranscriptomes***

173 We processed two samples for metatranscriptome sequencing; the single sample that tested  
174 positive for EVEV (4.1) and a sample that was negative for EVEV (1.1). Following the  
175 manufacturer's protocol, the GeneRead rRNA Depletion Kit (Qiagen, Inc., Hilden, Germany)  
176 was used to reduce the burden of *C. cedecei* vector DNA and RNA. Depleted samples were then  
177 processed with the REPLI-g Single Cell Whole Transcriptome Amplification (WTA) kit  
178 (Qiagen, Inc.), according to the manufacturer's protocol. After review of the REPLI-g nanopore  
179 data, it was determined that a comparison to another WTA method for nanopore  
180 metatranscriptome sequencing was prudent (additional details in Results). Following the  
181 manufacturer's protocol, we also processed the raw TNA sample with the WTA2 Complete  
182 Whole Transcriptome Amplification kit from Sigma-Aldrich Inc. (St. Louis, MO, USA). WTA  
183 products (from either kit) were purified with Agencourt (Beverly, MA, USA) AMPure<sup>®</sup> beads as  
184 follows; 1.8x the eluted WTA product volume (54 µl) of AMPure beads was added to the WTA-  
185 product (30 µl) and pipette-mixed 10 times. The reaction was placed on a magnetic stand for 10  
186 minutes and the cleared solution was aspirated away. The cDNA-bound magnetic beads were  
187 washed 2x with 200 µl 70% ethanol and allowed to air dry for 5 minutes. 40 µl of dH<sub>2</sub>O was  
188 added to the washed beads and pipette-mixed 10 times. The sample was placed back on the  
189 magnetic stand for 10 minutes. The purified, eluted cDNA was transferred to a fresh 1.5 ml tube



190 and quantified with a Qubit fluorometer (ThermoFisher Sci., Waltham, MA, USA) according to  
191 the manufacturer's protocol.

192

### 193 *Nanopore sequencing of Metatranscriptomes*

194 The WTA products from virus-positive sample 4.1 and virus-negative sample 1.1 were prepared  
195 for nanopore sequencing using ONT's 1D Ligation Sequencing library preparation kit (SQK-  
196 LSK108), following the manufacturer's protocol. The library was loaded onto an R9.4 flow cell.  
197 Two separate flow cells were used for each sample for sequencing of the REPLI-g generated  
198 samples. For the Sigma WTA2 generated samples, the same flow cell was re-used for sample 1.1  
199 (virus-negative sample) *after* sequencing sample 4.1 (virus-positive sample) and  
200 flushing/washing with the ONT Flowcell Wash Kit (EXP-WSH002). For all WTA products, the  
201 NC\_48Hr\_Sequencing\_Run\_FLO-MIN106\_SQK-LSK108\_plus\_Basecaller.py script was used  
202 for collecting data. The REPLI-g 4.1 sample was run for approximately 26.5 hours, with a total  
203 of 1142 channels with active pores detected during the pre-run mux scan. The REPLI-g 1.1  
204 sample was run for approximately 12 hours, with a total of 1465 channels with active pores  
205 detected during the pre-run mux scan. The Sigma WTA2 4.1 sample was run for approximately  
206 20 hours, with a total of 1168 channels with active pores detected during the pre-run mix scan.  
207 The Sigma WTA2 1.1 sample was run for approximately 7.5 hours, with a total of 551 channels  
208 with active pores detected during the pre-run mux scan.

209

### 210 *Illumina sequencing of Metatranscriptomes*

211 The WTA product from virus-positive sample 4.1 was prepared for Illumina sequencing using  
212 Illumina's Nextera XT library prep kit (FC-131-1024), following the manufacturer's protocol  
213 through the library clean-up step. Manual normalization was performed following DNA  
214 quantitation of the CAN product using the Qubit fluorometer to ensure a sufficient quantity of  
215 library was generated. The library was then diluted using a conversion factor of 2 to 2nM and  
216 pooled with other libraries. The libraries were added to a cartridge at a final loading  
217 concentration of 12pM using a MiSeq Reagent Kit V2 (MS-102-2002). A 2 x 151 paired-end  
218 run was performed on the Illumina MiSeq system (SY-410-1003) using the FASTQ only  
219 workflow.

220

221 ***Bioinformatics and Data Analysis***

222 *Nanopore Data ---*

223 Nanopore reads were basecalled using the local basecalling algorithm in MinKNOW version  
224 1.4.3. FAST5 files of basecalled reads were converted to FASTA files using *poretools*.<sup>50</sup> The  
225 FASTA files from each sequenced sample (4.1 and 1.1) were queried for EVEV/VEEV using  
226 several kmer-based metagenomics taxonomy callers, including Kraken<sup>51</sup>, Kaiju<sup>52</sup>, and  
227 Centrifuge.<sup>53</sup> Two full-length read-mapping alignment tools, LAST<sup>54</sup> and BWA-MEM<sup>55</sup>, were  
228 also tested. For computational resource and analysis time considerations, these read-mapping  
229 tools were deployed with a custom database of 144 VEEV genomes (rather than the larger  
230 RefSeq-sized databases of the kmer tools). See *Supplementary Material* for specific parameters  
231 called for each tool, as well as a list of accession numbers for all VEEV references in the custom  
232 database. The SAM alignment file generated via BWA-MEM mapping (with '-x ont2d' flag  
233 called) to the custom VEEV database was imported into CLC-Genomics Workbench version  
234 10.0.1 (CLC) and converted to tracks for visualization purposes and exploratory analysis in  
235 comparison to Illumina MiSeq reads mapping to the same VEEV genomes.

236

237 *Illumina Data---*

238 Sequencing reads from sample 4.1 were trimmed to a Q=30 quality score in CLC and analyzed  
239 for total taxonomic composition using *kraken*, *kaiju*, and *centrifuge* (See *Supplementary*  
240 *Material* for specific parameters for each tool). In addition, reads were mapped to the custom  
241 database of VEEV genomes with BWA-MEM and in CLC. Variants were called in CLC using  
242 the Basic Variant Detection Tool, which makes no assumptions about the underlying data.  
243 Sixteen (16) high frequency (HF) variants were called using this tool such that non-specific  
244 matches were ignored, a minimum of 30x coverage was required, and the variant called was  
245 required to be 100% penetrant (homozygous) with a minimum Q30 quality score. Three HF  
246 variants were predicted to result in amino acid changes. Low frequency (LF) variants, 60 in total  
247 including HF variants, were also called in a similar manner but had a 30x minimum coverage,  
248 with the variant allele being a minimum 10% frequency and 10x coverage at Q30 or above. A  
249 total of 18 LF variants were predicted to result in amino acid changes. A consensus genome was  
250 generated from the top two VEEV genomes recruiting the most reads, and the Illumina reads  
251 themselves. The consensus genome, called 'EVG-2016\_CxCdci\_4\_1', was included in a



252 multiple sequence alignment (MSA) with the database of 144 VEEV genomes. A pruned  
253 phylogenetic tree was constructed using the 30 closest relatives. The chosen tree construction  
254 was the neighbor-joining method<sup>56</sup> and the nucleotide distance measure used was Jukes-Cantor.<sup>57</sup>  
255 The tree was validated with 1,000 bootstrap replicates.

#### 256 257 *Data Availability ---*

258 All raw sequence data from this work can be found at NCBI under BioProject PRJNA399278  
259 (<https://www.ncbi.nlm.nih.gov/bioproject/399278>). Illumina data for Sample 4.1 is deposited  
260 with accession #XXXX. Nanopore data from REPLI-g amplified Sample 4.1 is deposited under  
261 accession #XXXX and Sample 1.1 is under accession #XXXX. Nanopore data from Sigma  
262 WTA2 amplified Sample 4.1 is deposited under accession #XXXX and Sample 1.1 is under  
263 accession #XXXX. *De-novo* assembled contigs for VEEV strain EVG-2016\_CxCdci\_4\_1 were  
264 submitted to GenBank with accession #XXXX. (#XXXX = *Data currently being submitted to*  
265 *public archives.*)

## 266 267 **RESULTS**

### 268 *RT-QPCR Arbovirus Surveillance ---*

269 During our study, a single sample pool (Sample 4.1) tested positive for VEEV with a C<sub>t</sub> value of  
270 33.92 on the Biomeme two3 machine. The only sample that was positive for VEEV on the  
271 CFX96 system was also 4.1, with a C<sub>t</sub> value of 30.63 (**Figure 2**). The Biomeme two3 device  
272 proved to be an effective, ultra-portable platform for initial triaging of mosquito samples in the  
273 field. While it could benefit from a higher throughput capacity, its small size and intuitive user  
274 interface render it a very capable field-forward molecular biosurveillance tool. It can also  
275 perform as a field-able heat-block and thermocycler for the steps in nanopore library generation  
276 that require such items.

### 277 278 *Nanopore Sequencing (REPLI-g Single Cell WTA) ---*

279 426,580 reads were successfully basecalled for the REPLI-g processed Sample 4.1; the average  
280 read length was 1,403 bp and the maximum read length was 21,258 bp. 106,040 reads were  
281 successfully basecalled for the REPLI-g processed Sample 1.1; the average read length was  
282 2,038 bp and the maximum read length was 61,951 bp (**Table 1**). Detection of VEEV in 4.1

283 varied across several metagenomic taxonomy callers (Kraken, Kaiju, Centrifuge) that assign  
284 read-derived kmers to comprehensive genome databases (e.g., RefSeq). The two full-length read-  
285 mapping alignment tools (LAST, BWA-MEM) also varied in reported VEEV signal.

286  
287 Kraken assigned a single nanopore read from sample 4.1 to VEEV, Centrifuge assigned 2 reads,  
288 and Kaiju assigned up to 10 reads. Kraken and Centrifuge offer less flexibility in parameter  
289 adjustment/loosening and were run with defaults as they were deemed acceptable for nanopore  
290 classification (i.e., Kraken's `--min-hits` and Centrifuge's `--min-hitlen` and `--min-totalen`). Kaiju  
291 allows greater flexibility in parameter adjustment. In our Kaiju submission script, we leveraged  
292 the 'greedy mode' and set the number of allowed mismatches to 10. We also lowered the  
293 minimum match score to 35 (from a default of 65). Running Kaiju with default parameters  
294 detected 9 VEEV reads in the 4.1 nanopore data. Loosening Kaiju's parameters further than  
295 described above did not yield more than 10 VEEV reads. Of the direct read-mapping tools,  
296 BWA-MEM (with '`-x ont2d`' flag passed) identified 33 VEEV reads from 4.1 nanopore data and  
297 LAST with nanopore-specific settings (see *Supplementary Material*) identified 13 VEEV reads.  
298 With default settings, BWA-MEM identified 27 VEEV reads in sample 4.1. A single read was  
299 classified as VEEV in virus-negative sample 1.1 by LAST, however, this was a secondary low-  
300 quality alignment (See *Supplementary Material*). The rest of the tools tested associated no reads  
301 with VEEV in sample 1.1 (**Table 1**).

302  
303 For each read that was mapped to the VEEV database by BWA-MEM and LAST, the highest  
304 quality alignment was overwhelmingly one of two strains; EVG3-95 (KR260737) and Fe3-7c  
305 (AF075251). Both strains are the only Everglades Virus strains in the database of 144 VEEV  
306 genomes. The 33 reads aligned to VEEV by BWA-MEM were associated with 3 strains total; 19  
307 reads to EVG3-95 (KR260737), 13 reads to Fe3-7c (AF075251), and 1 read to AG80-663  
308 (AF075258, isolated in Argentina 1998). The 19 EVG3-95 reads covered 16% of the reference  
309 genome. The 13 Fe3-7c reads covered 10% of the reference genome (**Table 2**).

310  
311 All REPLI-g nanopore reads mapping to Everglades Virus strain EVG3-95 via BWA-MEM  
312 aligned to the final ~4,000 basepairs of the 3'-region of the genome (**Figure 3**). This region  
313 encodes a sub-genomic 26S rRNA that is translated into a structural polyprotein which

314 undergoes proteolytic cleaving to generate the viral capsid and the E2 and E1 envelope  
315 glycoproteins.<sup>58</sup> A particularly high abundance of Illumina reads mapping to this region, and  
316 exclusive mapping of REPLI-g reads, is a likely indicator of an actively replicating viral  
317 infection since the 26S rRNA can only be transcribed from a full-length, negative sense RNA  
318 intermediate that itself can only be produced from the nsP1/nsP4 enzyme complex required for  
319 replication.<sup>59</sup> RNA sequencing studies have recently shown that this region of the VEEV genome  
320 is also transcribed at significantly higher levels relative to the full length genomic RNA at the  
321 initial stages of infection. Thus, one can expect that a sample sequenced at this stage would have  
322 a high abundance of reads recruited to the 3'-region of the genome. This is observed in the  
323 alignment dynamics of both Illumina and REPLI-g nanopore reads. However, it should also be  
324 noted that the majority of VEEV-aligning REPLI-g generated nanopore reads were chimeric in  
325 nature. This can be visualized in the shade of green of REPLI-g nanopore reads aligning to  
326 Everglades Virus strain EVG3-95 (**Figure 3**). Darker green regions align to the reference,  
327 whereas lighter green regions do not.

328

### 329 **REPLI-g Cell & Single Cell WTA Challenges for Nanopore Sequencing ---**

330 Inspection of the alignments of REPLI-g generated nanopore reads that mapped to VEEV  
331 showed a high proportion of chimeric reads that only had a fraction of the read length aligning  
332 with any VEEV reference genomes. BLAST analysis of the remainder of the reads often hit to  
333 various mosquito species' genomes (**Supplementary Figure 1A, 1B**), indicating combined  
334 vector/pathogen chimeric reads. Review of the specific chemistry of REPLI-g's WTA process  
335 highlighted a step that is likely to be problematic for long-read sequencing technologies: namely,  
336 the ligation step. After complementary DNA (cDNA) is generated from RNA templates, the  
337 cDNA fragments are randomly ligated together to create longer molecules. This enhances the  
338 efficiency of the REPLI-g SensiPhi DNA polymerase during the multiple displacement  
339 amplification (MDA) reaction and, if used for populations of single cells from singular  
340 organisms, the impact on downstream quantification of transcripts is negligible. However, given  
341 the high efficiency and fidelity of the SensiPhi DNA polymerase, these kits have been attractive  
342 for *meta-omics* studies, with populations of multiple species, from low diversity, low biomass  
343 environments or investigations with minimal biological sample material<sup>60-62</sup>. For short-read  
344 sequencing technologies (i.e., Illumina), the confounding effects of the ligation step, and

345 subsequent chimeric cDNAs, are negligible, or an acceptable trade-off for the efficacy of  
346 SensiPhi DNA polymerase. This is due to the low fraction of short reads that will, by chance,  
347 span a chimeric junction. With *long read* sequencing technologies, such as MinION or PacBio,  
348 this fraction is more likely to pose a challenge as long reads have a higher likelihood of spanning  
349 chimeric junctions. This is not necessarily problematic, depending on the use-case. For example,  
350 if the goal is simply detection of organisms of interest from a particular sample matrix in a  
351 biosurveillance context, then bioinformatics precautions can be set such that any existing signal  
352 will be recovered, despite the ligated fragments (e.g., reducing required fraction of reads that  
353 must align, reducing seed lengths, etc.). Indeed, informative recovery of Everglades Virus reads  
354 was observed with REPLI-g generated nanopore data (**Table 1, Figure 3**). However, in other  
355 analyses requiring high quality alignments (e.g., epidemiological strain mapping, genome  
356 finishing), these chimeras will present more of a problem. Ideally, no analyses are precluded  
357 from the generated data, so we selected another WTA kit to test that does not include the random  
358 ligations of cDNA fragments inherent to REPLI-g. We chose the WTA2 kit from Sigma-Aldrich.  
359

### 360 *Nanopore Sequencing (Sigma WTA2) ---*

361 212,192 reads were successfully basecalled for the Sigma WTA2 processed Sample 4.1; the  
362 average read length was 957 bp and the maximum read length was 13,207 bp. 71,355 reads were  
363 successfully basecalled for the REPLI-g processed Sample 1.1; the average read length was 448  
364 bp and the maximum read length was 60,895 bp (**Table 1**). The same taxonomy-calling tools  
365 tested on the REPLI-g nanopore data were also tested on the Sigma WTA2 nanopore data, using  
366 the same settings. In Sample 4.1; Kraken detected 2 VEEV reads, Kaiju detected 17 VEEV  
367 reads, Centrifuge detected 2 VEEV reads, LAST detected 446 VEEV reads, and BWA-MEM  
368 detected 21 VEEV reads with default settings and 75 with the '-x ont2d' flag passed. In Sample  
369 1.1; Kraken detected 0 VEEV reads, Kaiju detected 1 VEEV read, Centrifuge detected 0 VEEV  
370 reads, LAST detected 142 VEEV reads, and BWA-MEM detected 6 VEEV reads with default  
371 settings and 21 with the '-x ont2d' flag passed (**Table 1**). It is presumed that the higher incidence  
372 in VEEV reads detected in Sample 1.1 from Sigma WTA2 generated nanopore data is due to  
373 carry-over from insufficient washing and re-use of the flow cell after sequencing Sample 4.1.  
374 During REPLI-g testing, a fresh flow cell was used for each sample.

375

376 In contrast to the REPLI-g generated nanopore reads, Sigma WTA2 reads aligned to all coding  
377 regions of the EVG3-95 genome. Additionally, Sigma WTA2 generated nanopore reads showed  
378 lower rates of chimeric reads (**Figure 3**). This may be primarily due to the lack of the ligation  
379 step in the Sigma WTA2 protocol. However, various other key differences between the kits (e.g.,  
380 SensiPhi vs. WTA2 polymerase activity, sequence composition of universal primers, etc.) are  
381 likely to contribute to observed differences in alignment dynamics for VEEV-associated reads.  
382 The 74 Sigma reads aligned to VEEV by BWA-MEM were associated with 3 strains; 45 reads to  
383 KR260736 (VEEV strain COAN5506, a 1967 equine isolate from Colombia), 25 reads to  
384 KR260737, and 4 reads to AF075251. While the numerical majority of Sigma WTA2 reads  
385 aligned to the Colombian strain, the coverage of this genome was much lower (2%) than that of  
386 the Everglades Virus strains (KR260737 - 55%, AF075251 - 11%) (**Table 2**). The total length of  
387 strain COAN5506 with zero read coverage is 11,276 basepairs out of a 11,495 bp genome,  
388 indicating stacking of approximately 219 bp reads at one location (**Table 2**).

389

### 390 *Illumina Sequencing ---*

391 6,429,832 paired-end (2 x 151 bp) Illumina MiSeq reads were generated for Sample 4.1 and the  
392 average quality-trimmed read length was 143 bp (**Table 1**). The taxonomy-calling tools used on  
393 the nanopore datasets were also used on the Illumina data, however, default settings of each tool  
394 were used rather than nanopore-specific parameters (See Methods). Kraken identified 796 VEEV  
395 reads, Kaiju identified 2,420, Centrifuge identified 1,042, default BWA-MEM identified 5,269,  
396 and CLC identified 12,680 VEEV reads under default settings (**Table 1**). The highest  
397 represented VEEV strain in the Illumina data were the two Everglades virus (EVEV) strains;  
398 EVG3-95 (KR260737), followed by Fe3-7c (AF075251). These two strains accounted for 99.7%  
399 of all VEEV-associated reads as mapped by BWA-MEM (**Table 2**).

400

401 We observed a notable increase of Illumina reads mapping to the 26S sub-genomic RNA region,  
402 in the final 4.0 kb of the EVG3-95 genome, as was observed in the REPLI-g generated nanopore  
403 reads (**Figure 3**). While we predicted an active viral infection based solely on a limited number  
404 of nanopore reads, the higher density of Illumina reads mapping to the 26S region provides  
405 evidence of active EVEV replication in the 4.1 mosquito pool sample, rather than a latent  
406 infection or trace detection.

407

408 ***Variant Detection in Nanopore and Illumina Data ---***

409 From Illumina sequencing data, we observed 16 high-quality single nucleotide variants (SNVs)  
410 across the strain EVG3-95 genome (**Table 3, Figure 3**). 10 of these variants (~ 62%) were also  
411 detected in a nanopore sequencing read, regardless of which WTA-method was used. 10 SNVs  
412 were located in the 26S sub-genomic RNA region. Of these 10 variants, 7 were detected in a  
413 MinION nanopore read, 6 of the 7 were detected by a REPLI-g generated MinION read, and 3 of  
414 the 7 were detected by a Sigma WTA2 generated MinION read. Of the 6 SNVs in the first ~7 kb  
415 of the reference genome, 3 were *only* detected by Sigma WTA2 MinION reads. This data  
416 highlights the potential of the MinION nanopore sequencer to be leveraged for real-time,  
417 *unbiased*, SNV-level strain-tracking of arbovirus targets, directly from complex environmental  
418 samples.

419

420 ***Phylogeny of EVEV-2016\_CxCdci\_4\_1 ---***

421 Everglades virus strains belong to the Type-2 VEEV serogroup; a distinct phylogenetic group  
422 within the VEEV serocomplex. A consensus genome of the suspected strain of EVEV present in  
423 sample 4.1 was generated from the EVEV strain EVG3-95 genome, EVEV strain Fe3-7c  
424 genome, and the 12,680 Illumina reads mapping to these genomes in CLC. We label this  
425 consensus genome scaffold 'EVG-2016\_CxCdci\_4\_1' (**Figure 4**). This name denotes the strain's  
426 detection just outside of Everglades National Park in the autumn of 2016, the vector mosquito  
427 species (*Culex cedecei*), and the mosquito pool sample from this study that contained the virus  
428 (4.1). Phylogenetic analysis using full-length genomes of the 144 VEEV strains in our reference  
429 database clustered the EVG-2016\_CxCdci\_4\_1 strain's genome scaffold distinctly with the other  
430 EVEV strains and it appears more closely related to the EVG3-95 strain (KR260737) than the  
431 Fe3-7c strain (AF075251) (**Figure 4**).

432

433 **DISCUSSION ---**

434 Unbiased meta-omics approaches offer the ability to monitor the presence of nearly all potential  
435 pathogens in a single test. In geographic regions where several distinct pathogens can cause  
436 nearly identical febrile illness symptoms, the elimination of the need for multiple individual tests  
437 translates to reduced time for appropriate clinical or public health decisions to be made. Often,



438 these same regions have limited capacity and infrastructure requirements to fully support brick-  
439 and-mortar laboratories and second-generation sequencing machines. Consequently, the prospect  
440 of unbiased meta-omics pathogen surveillance on devices as portable and low-maintenance as  
441 the MinION is a critical advantage that stands to fundamentally change the fight against  
442 emerging infectious diseases worldwide. However, challenges to the full realization of this  
443 potential remain.

444  
445 When using unbiased meta-omics techniques, signal from the organism-of-interest is generally a  
446 small fraction of the total data output. Indeed, over 99% of nanopore reads from both sample 4.1  
447 and 1.1 were annotated as ‘unclassified’ with Kaiju and Centrifuge analysis (**Supplementary File**  
448 **1, Supplementary File 2**). The reference databases used by the metagenomics classifiers used are  
449 focused on microbial and viral species, so this result indicates that over 99% of the nanopore  
450 signal was (not surprisingly) from the eukaryote host (*Culex cedecei*). This was confirmed  
451 through BLAST analysis of several of the longest reads (**Supplementary Figure 1A, 1B**, and  
452 data not shown). The use of the GeneRead rRNA Depletion Kit was critical in this context,  
453 enabling sufficient host depletion for detection of EVEV RNA.

454  
455 EVEV was detected in sample 4.1 using kmer-based taxonomy callers that leveraged RefSeq-  
456 sized databases, however, a more robust signal was observed when using read-mapping tools  
457 with target-specific databases (**Table 1**). While the use of targeted databases may preclude the  
458 reporting of other organisms that the MinION reads may map equally well to, it should not  
459 falsely inflate the presence of the organism-of-interest since read-mapping settings are fixed and  
460 each read is given an equal chance at mapping to each reference genome. Thus, we should expect  
461 the same number of reads associated with the organism-of-interest whether we are using all of  
462 RefSeq or a streamlined, targeted database. The key advantage in using streamlined databases  
463 targeting specific organisms-of-interest is that it enables read-mapping tools to be deployed on  
464 portable commodity computing systems (i.e., Intel NUC, Macbook Pro, etc.), further supporting  
465 the field-forward position of these types of analytical approaches. Importantly, field-forward  
466 researchers do not need to “choose” one or the other. Kmer-tools with comprehensive databases  
467 (i.e., Kaiju, Centrifuge) and read-mapping tools that query streamlined, targeted databases (i.e.,  
468 BWA-MEM, LAST) can both be utilized effectively on portable computing systems. Therefore,

469 there's an advantage to installing Kaiju or Centrifuge, *and* BWA-MEM or LAST, onto any  
470 computing system meant for agnostic nanopore sequencing in the field, and using them in  
471 tandem with appropriate corresponding databases to conduct surveillance of broad groups of  
472 organisms.

473

474 Total analysis time for EVEV-positive sample 4.1, from sample collection through data analysis,  
475 was approximately 26 hours with MinION sequencing of the Sigma WTA2 product, compared to  
476 more than 30 hours with sequencing on the Illumina MiSeq (**Figure 1**). BWA-MEM, Centrifuge,  
477 Kaiju, and LAST were tested on a compact, portable commodity computing system (hyper-  
478 threaded quad-core, 32GB RAM Intel NUC Skull Canyon) running the Ubuntu 16.04 LTS  
479 operating system. These tools had rapid processing times for the nanopore data ( $\leq$  ~20 mins).

480 The time-to-result for nanopore sequencing could have been reduced to between 3 and 6 hours if  
481 the original VEEV amplicon had been used as the sequencing material, and an internet  
482 connection was available for real-time taxonomy calling<sup>34</sup>. However, an agnostic approach  
483 demands extra time investment not required of amplicon sequencing due to the increased  
484 sequencing depth required to detect ultra-low abundance signals. We did not monitor the  
485 nanopore data in real-time, so it is not possible to determine exactly how long it took to detect an  
486 EVEV signal. Nonetheless, we were able to generate actionable biosurveillance data within a  
487 time frame amenable to enacting rapid response measures from public health entities (~1 day).

488

489 One aspect of ONT's workflow that is critical for effective field deployment is their flow cell  
490 wash procedure. Minimizing the required amount of consumables that must be carried to remote  
491 field sites is still one of the primary challenges for mobilized deployment of nanopore  
492 sequencing, and so, the washing/flushing and re-use of the flow cells is an important feature of  
493 the MinION platform. In addition, when attempting to distinguish problematic or infectious  
494 samples from benign samples using agnostic sequencing, inter-run cross-contamination will be a  
495 confounding issue. We washed and re-used a R9.4 flowcell to sequence EVEV-negative, Sigma  
496 WTA2-processed sample 1.1 *after* we sequenced EVEV-positive, Sigma processed sample 4.1.  
497 We found low-level cross contamination of EVEV reads in sample 1.1 that we suspect originated  
498 from sample 4.1, despite following the ONT wash kit protocol exactly (**Table 1**). It is not  
499 suspected that this was trace signal of EVEV in sample 1.1 that was only detected with Sigma

500 WTA2 processing since sample 1.1 was negative for VEEV/EVEV in the RT-qPCR assay  
501 (**Figure 2**). When a fresh R9.4 flowcell was used for each REPLI-g processed sample, no cross  
502 contamination was widely reported across tested taxonomy classification tools.

503  
504 A list specific items (hardware, software, reagents, consumables, etc.) used to complete the work  
505 discussed here is given in the *Supplementary Material*. Taken together, these items can fit within  
506 a single, medium sized (40L) expedition-style backpack. This has not been lost on the research  
507 community and efforts to push nanopore-based molecular biosurveillance as far afield as  
508 possible have been prodigious<sup>28,29,38,63,64</sup>, including Low-Earth orbit<sup>65</sup> and beyond.<sup>66,67</sup> However,  
509 while carrying the items that are physically handled during sample processing is trivial,  
510 transporting the accompanying power and cold-chain logistical equipment has been more  
511 challenging and likely a primary factor preventing wider adoption of the technology in austere  
512 public health settings. The incredibly small footprint of the MinION is not fully empowered  
513 when one must also transport diesel generators, fuel, and mini-freezers as well. Development of  
514 intuitively designed, logistics-integrated, single-person portable laboratories will facilitate the  
515 future that the MinION's form-factor inspires.

516  
517 Future work will determine whether agnostic nanopore sequencing will be an effective  
518 biosurveillance tool on lower-titer pathogens – such as contaminated food samples or blood  
519 samples taken from sentinel wildlife populations. Our work likely benefited from the high-titer  
520 characteristic of VEEV infections and an actively replicating virus. However, the chemistry of  
521 ONT's MinION flowcells and library preparation reagents remain under active development and  
522 improvements in both data yield and sequencing read quality are being released regularly<sup>63</sup>. We  
523 expect this to translate to unbiased strain-level detection of a wider array of organisms from even  
524 more challenging samples in the near future.

## 525 526 **CONCLUSIONS**

527 Previous unbiased, meta-omics nanopore sequencing approaches to strain-specific target  
528 classification and SNV-calling have been limited to human blood, unknown isolates, or mixed  
529 culture sample matrices.<sup>35,64</sup> In this study, we've pushed this capability to include complex  
530 biological sample matrices collected in the field – namely crushed mosquito pools collected from

531 field traps. We describe a protocol that leverages ultra-compact hardware (e.g. the Biomeme  
532 two3, Intel NUC, and ONT MinION) to enable field-forward use of unbiased nanopore  
533 sequencing for the purposes of arbovirus biosurveillance. This work demonstrates the utility of  
534 nanopore sequencing for a wide array of public health and basic research use-cases in  
535 environmental biosurveillance. It is our hope that this work will further encourage the adoption  
536 of field-forward sequencing and bioinformatics to routinely bring the laboratory to the sample.  
537  
538  
539

540 **REFERENCES**

- 541 1. Afshinnkoo, E. *et al.* Precision Metagenomics: Rapid Metagenomic Analyses for  
542 Infectious Disease Diagnostics and Public Health Surveillance. *J. Biomol. Tech.* **28**, 40–45  
543 (2017).
- 544 2. Inglis, T. J. J. Adapting the mobile laboratory to the changing needs of the Ebola virus  
545 epidemic. *J. Med. Microbiol.* **64**, 587–91 (2015).
- 546 3. Wölfel, R. *et al.* Mobile diagnostics in outbreak response, not only for Ebola: a blueprint  
547 for a modular and robust field laboratory. *Euro Surveill.* **20**, (2015).
- 548 4. Gardy, J., Loman, N. J. & Rambaut, A. Real-time digital pathogen surveillance — the  
549 time is now. *Genome Biol.* **16**, 155 (2015).
- 550 5. Doggett, N. A. *et al.* Culture-Independent Diagnostics for Health Security. *Heal. Secur.*  
551 **14**, 122–42 (2016).
- 552 6. Perkel, J. M. Pocket laboratories. *Nature* **545**, 119–121 (2017).
- 553 7. Mulcahy-O’Grady, H. & Workentine, M. L. The Challenge and Potential of  
554 Metagenomics in the Clinic. *Front. Immunol.* **7**, 29 (2016).
- 555 8. Miller, R. R., Montoya, V., Gardy, J. L., Patrick, D. M. & Tang, P. Metagenomics for  
556 pathogen detection in public health. *Genome Med.* **5**, 81 (2013).
- 557 9. Lim, Y. W. *et al.* Clinical insights from metagenomic analysis of sputum samples from  
558 patients with cystic fibrosis. *J. Clin. Microbiol.* **52**, 425–437 (2014).
- 559 10. Huang, A. D. *et al.* Metagenomics of Two Severe Foodborne Outbreaks Provides  
560 Diagnostic Signatures and Signs of Coinfection Not Attainable by Traditional Methods.  
561 *Appl. Environ. Microbiol.* **83**, (2017).
- 562 11. Valdivia-Granda, W. A. Biodefense Oriented Genomic-Based Pathogen Classification  
563 Systems: Challenges and Opportunities. *J. Bioterror. Biodef.* **3**, 1–9 (2012).
- 564 12. Epstein, J. H. *et al.* Identification of GBV-D, a novel GB-like flavivirus from old world  
565 frugivorous bats (*Pteropus giganteus*) in Bangladesh. *PLoS Pathog.* **6**, e1000972 (2010).
- 566 13. Coffey, L. L. *et al.* Enhanced arbovirus surveillance with deep sequencing: Identification  
567 of novel rhabdoviruses and bunyaviruses in Australian mosquitoes. *Virology* **448**, 146–  
568 158 (2014).
- 569 14. Temmam, S., Davoust, B., Berenger, J.-M., Raoult, D. & Desnues, C. Viral metagenomics  
570 on animals as a tool for the detection of zoonoses prior to human infection? *Int. J. Mol.*  
571 *Sci.* **15**, 10377–97 (2014).
- 572 15. Port, J. A., Cullen, A. C., Wallace, J. C., Smith, M. N. & Faustman, E. M. Metagenomic  
573 frameworks for monitoring antibiotic resistance in aquatic environments. *Environ. Health*  
574 *Perspect.* **122**, 222–8 (2014).
- 575 16. Bergholz, T. M., Moreno Switt, A. I. & Wiedmann, M. Omics approaches in food safety:  
576 fulfilling the promise? *Trends Microbiol.* **22**, 275–81 (2014).
- 577 17. Diaz-Sanchez, S., Hanning, I., Pendleton, S. & D’Souza, D. Next-generation sequencing:  
578 the future of molecular genetics in poultry production and food safety. *Poult. Sci.* **92**, 562–  
579 72 (2013).
- 580 18. Ottesen, A. R. *et al.* Baseline survey of the anatomical microbial ecology of an important  
581 food plant: *Solanum lycopersicum* (tomato). *BMC Microbiol.* **13**, 114 (2013).
- 582 19. Ozanich, R. M. *et al.* Evaluation of PCR Systems for Field Screening of *Bacillus*  
583 *anthracis*. *Heal. Secur.* **15**, 70–80 (2017).
- 584 20. Harrison, G. F., Scheirer, J. L. & Melanson, V. R. Development and validation of an  
585 arthropod maceration protocol for zoonotic pathogen detection in mosquitoes and fleas. *J.*

- 586 *Vector Ecol.* **40**, 83–9 (2015).
- 587 21. Meagher, R. *et al.* Real-time, Autonomous Biosurveillance for Vector-borne Viral  
588 Pathogens (SMART Traps).
- 589 22. Laing, E., Yan, L., Sterling, S. & Broder, C. A Luminex-based multiplex assay for the  
590 simultaneous detection of glycoprotein specific antibodies to ebolaviruses,  
591 marburgviruses, and henipaviruses. *Int. J. Infect. Dis.* **53**, 108–109 (2016).
- 592 23. Lee, W. *Review and analysis of bioidentification systems for mobile laboratory and field*  
593 *use.* (2016).
- 594 24. Shukla, S., Hong, S.-Y., Chung, S. H. & Kim, M. Rapid Detection Strategies for the  
595 Global Threat of Zika Virus: Current State, New Hypotheses, and Limitations. *Front.*  
596 *Microbiol.* **7**, 1–15 (2016).
- 597 25. Bartholomew, R. A. *et al.* Evaluation of Immunoassays and General Biological Indicator  
598 Tests for Field Screening of *Bacillus anthracis* and Ricin. *Heal. Secur.* **15**, 81–96 (2017).
- 599 26. Urban, J. M., Bliss, J., Lawrence, C. E. & Gerbi, S. A. Sequencing ultra-long DNA  
600 molecules with the Oxford Nanopore MinION. *bioRxiv* **19281**, (2015).
- 601 27. Giordano, F. *et al.* De novo yeast genome assemblies from MinION, PacBio and MiSeq  
602 platforms. *Sci. Rep.* **7**, 3935 (2017).
- 603 28. Edwards, A. *et al.* Deep Sequencing: Intra-Terrestrial Metagenomics Illustrates The  
604 Potential Of Off-Grid Nanopore DNA Sequencing. *bioRxiv* (2017). doi:10.1101/133413
- 605 29. Johnson, S. S., Zaikova, E., Goerlitz, D. S., Bai, Y. & Tighe, S. W. Real-Time DNA  
606 Sequencing in the Antarctic Dry Valleys Using the Oxford Nanopore Sequencer. *J.*  
607 *Biomol. Tech.* **28**, 2–7 (2017).
- 608 30. Branton, D. *et al.* The potential and challenges of nanopore sequencing. *Nat. Biotechnol.*  
609 **26**, 1146–53 (2008).
- 610 31. Köser, C. U. *et al.* Routine use of microbial whole genome sequencing in diagnostic and  
611 public health microbiology. *PLoS Pathog.* **8**, e1002824 (2012).
- 612 32. Quick, J. *et al.* Rapid draft sequencing and real-time nanopore sequencing in a hospital  
613 outbreak of Salmonella. *Genome Biol.* **16**, 114 (2015).
- 614 33. Hoenen, T. *et al.* Nanopore Sequencing as a Rapidly Deployable Ebola Outbreak Tool.  
615 *Emerg. Infect. Dis.* **22**, 331–4 (2016).
- 616 34. Juul, S. *et al.* What’s in my pot? Real-time species identification on the MinION. *bioRxiv*  
617 **30742**, (2015).
- 618 35. Greninger, A. L. *et al.* Rapid metagenomic identification of viral pathogens in clinical  
619 samples by real-time nanopore sequencing analysis. *Genome Med.* **7**, 99 (2015).
- 620 36. Hewitt, F. C., Guertin, S. L., Ternus, K. L., Schulte, K. & Kadavy, D. R. Toward Rapid  
621 Sequenced-Based Detection and Characterization of Causative Agents of Bacteremia.  
622 *bioRxiv* 162735 (2017).
- 623 37. Cornelis, S., Gansemans, Y., Deleye, L., Deforce, D. & Van Nieuwerburgh, F. Forensic  
624 SNP Genotyping using Nanopore MinION Sequencing. *Sci. Rep.* **7**, 41759 (2017).
- 625 38. Faria, N. R. *et al.* Mobile real-time surveillance of Zika virus in Brazil. *Genome Med.* **8**,  
626 97 (2016).
- 627 39. Guedes, D. R. *et al.* Zika virus replication in the mosquito *Culex quinquefasciatus* in  
628 Brazil. *Emerg. Microbes Infect.* **6**, e69 (2017).
- 629 40. Batovska, J., Lynch, S. E., Rodoni, B. C., Sawbridge, T. I. & Cogan, N. O. Metagenomic  
630 arbovirus detection using MinION nanopore sequencing. *J. Virol. Methods* (2017).  
631 doi:10.1016/j.jviromet.2017.08.019



- 632 41. Weaver, S. C., Winegar, R., Manger, I. D. & Forrester, N. L. Alphaviruses: population  
633 genetics and determinants of emergence. *Antiviral Res.* **94**, 242–57 (2012).
- 634 42. Zacks, M. A. & Paessler, S. Encephalitic Alphaviruses. *Vet. Microbiol.* **140**, 281 (2010).
- 635 43. Brault, A. C., Powers, A. M. & Weaver, S. C. Vector infection determinants of  
636 Venezuelan equine encephalitis virus reside within the E2 envelope glycoprotein. *J. Virol.*  
637 **76**, 6387–92 (2002).
- 638 44. Coffey, L. L. *et al.* Serologic evidence of widespread everglades virus activity in dogs,  
639 Florida. *Emerg. Infect. Dis.* **12**, 1873–9 (2006).
- 640 45. Carrara, A. *et al.* Venezuelan equine encephalitis virus infection of cotton rats. *Emerg.*  
641 *Infect. Dis.* **13**, 1158–65 (2007).
- 642 46. CHAMBERLAIN, R. W. *et al.* ARBOVIRUS STUDIES IN SOUTH FLORIDA, WITH  
643 EMPHASIS ON VENEZUELAN EQUINE ENCEPHALOMYELITIS VIRUS1. *Am. J.*  
644 *Epidemiol.* **89**, 197–210 (1969).
- 645 47. Ventura, A. K., Buff, E. E. & Ehrenkranz, N. J. Human Venezuelan equine encephalitis  
646 virus infection in Florida. *Am. J. Trop. Med. Hyg.* **23**, 507–12 (1974).
- 647 48. Bigler, W. J., Lassing, E., Buff, E., Lewis, A. L. & Hoff, G. L. Arbovirus surveillance in  
648 Florida: wild vertebrate studies 1965-1974. *J. Wildl. Dis.* **11**, 348–56 (1975).
- 649 49. Ehrenkranz, N. J., Sinclair, M. C., Buff, E. & Lyman, D. O. The natural occurrence of  
650 Venezuelan equine encephalitis in the United States. *N. Engl. J. Med.* **282**, 298–302  
651 (1970).
- 652 50. Loman, N. J. & Quinlan, A. R. Poretools: a toolkit for analyzing nanopore sequence data.  
653 *Bioinformatics* **30**, 3399–401 (2014).
- 654 51. Wood, D. E. & Salzberg, S. L. Kraken: ultrafast metagenomic sequence classification  
655 using exact alignments. *Genome Biol.* **15**, R46 (2014).
- 656 52. Menzel, P., Lee Ng, K. & Krogh, A. *Kaiju: Fast and sensitive taxonomic classification for*  
657 *metagenomics.* *bioRxiv* (2015). doi:10.1101/031229
- 658 53. Kim, D., Song, L., Breitwieser, F. P. & Salzberg, S. L. Centrifuge: rapid and sensitive  
659 classification of metagenomic sequences. *Genome Res.* gr.210641.116 (2016).  
660 doi:10.1101/gr.210641.116
- 661 54. Hamada, M., Ono, Y., Asai, K., Frith, M. C. & Hancock, J. Training alignment parameters  
662 for arbitrary sequencers with LAST-TRAIN. *Bioinformatics* **33**, 926–928 (2017).
- 663 55. Li, H. & Durbin, R. Fast and accurate long-read alignment with Burrows-Wheeler  
664 transform. *Bioinformatics* **26**, 589–95 (2010).
- 665 56. Saitou, N. & Nei, M. The neighbor-joining method: a new method for reconstructing  
666 phylogenetic trees. *Mol. Biol. Evol.* **4**, 406–25 (1987).
- 667 57. JUKES, T. H. & CANTOR, C. R. in *Mammalian Protein Metabolism* 21–132 (Elsevier,  
668 1969). doi:10.1016/B978-1-4832-3211-9.50009-7
- 669 58. Guerbois, M. *et al.* IRES-driven expression of the capsid protein of the Venezuelan equine  
670 encephalitis virus TC-83 vaccine strain increases its attenuation and safety. *PLoS Negl.*  
671 *Trop. Dis.* **7**, e2197 (2013).
- 672 59. Baer, A. *et al.* Venezuelan Equine Encephalitis Virus Induces Apoptosis through the  
673 Unfolded Protein Response Activation of EGR1. *J. Virol.* **90**, 3558–72 (2016).
- 674 60. Zoll, J. *et al.* Direct multiplexed whole genome sequencing of respiratory tract samples  
675 reveals full viral genomic information. *J. Clin. Virol.* **66**, 6–11 (2015).
- 676 61. Yao, G. *et al.* A Perspective Study of Koumiss Microbiome by Metagenomics Analysis  
677 Based on Single-Cell Amplification Technique. *Front. Microbiol.* **8**, 165 (2017).

- 678 62. Tong, X. *et al.* High diversity of airborne fungi in the hospital environment as revealed by  
679 meta-sequencing-based microbiome analysis. *Sci. Rep.* **7**, 39606 (2017).
- 680 63. Leggett, R. M. & Clark, M. D. A world of opportunities with nanopore sequencing. *J.*  
681 *Exp. Bot.* (2017). doi:10.1093/jxb/erx289
- 682 64. Walter, M. C. *et al.* MinION as part of a biomedical rapidly deployable laboratory. *J.*  
683 *Biotechnol.* **250**, 16–22 (2017).
- 684 65. Castro-Wallace, S. L. *et al.* Nanopore DNA Sequencing and Genome Assembly on the  
685 International Space Station. *bioRxiv* **77651**, (2016).
- 686 66. Rezzonico, F. Nanopore-based instruments as biosensors for future planetary missions.  
687 *Astrobiology* **14**, 344–51 (2014).
- 688 67. Karouia, F., Peyvan, K. & Pohorille, A. Toward biotechnology in space: High-throughput  
689 instruments for in situ biological research beyond Earth. *Biotechnol. Adv.* (2017).  
690 doi:10.1016/j.biotechadv.2017.04.003  
691  
692

693 **FIGURES & TABLES**

694

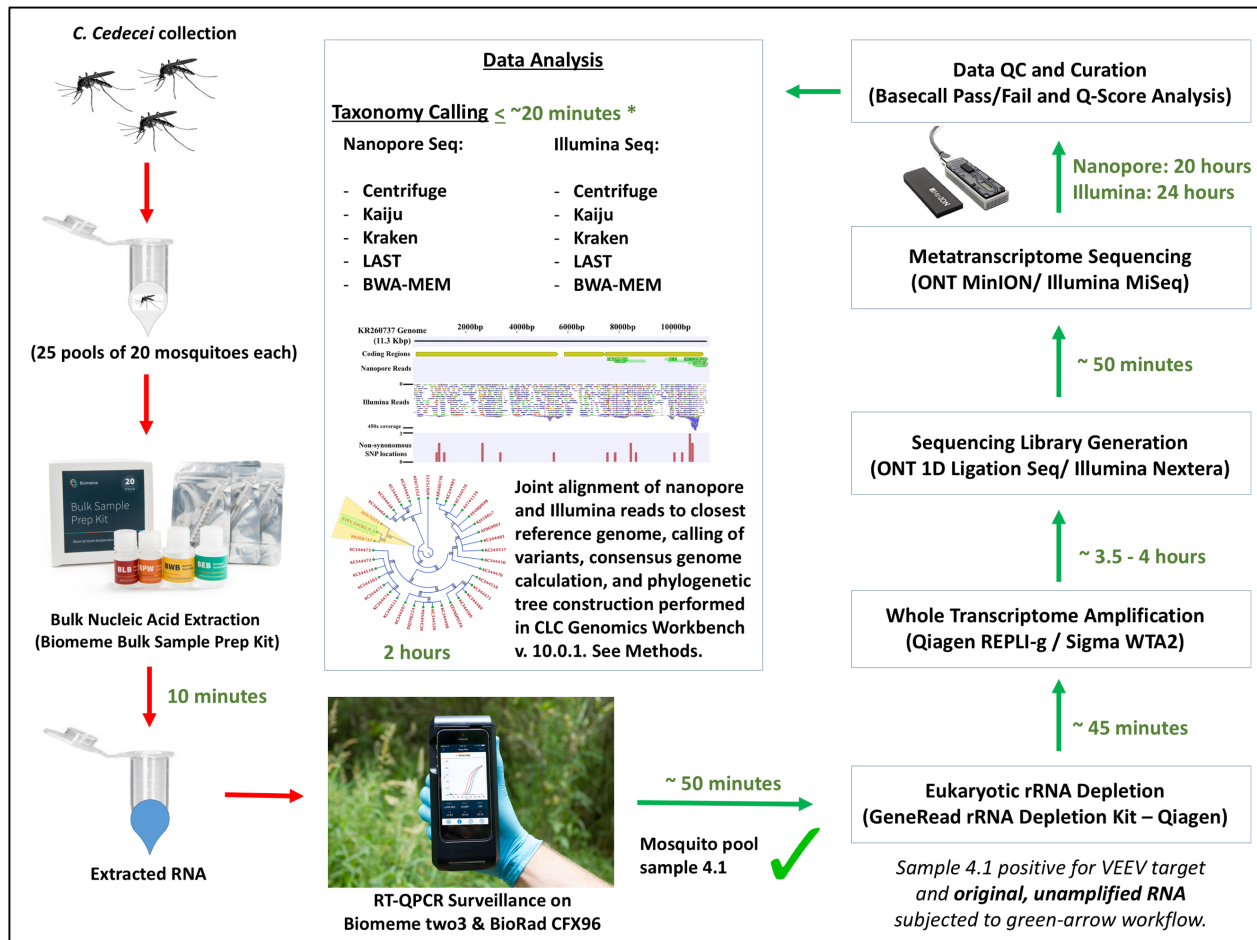

695

696 **Figure 1:** Overview of comparison between experimental field-based workflow and “gold-  
 697 standard” methods. Times to perform individual steps are listed in green. Times listed are for a  
 698 single hypothetical sample. Multiple samples can be processed at some steps with minimal  
 699 impact on process time (e.g., rRNA depletion, WTA) while other steps will have more  
 700 substantial increase in processing time with additional samples (e.g., nucleic acid extraction, data  
 701 analysis). (\*) indicates computational analysis time for nanopore data on a hyperthreaded quad-  
 702 core, 32GB RAM computing system (Intel NUC Skull Canyon). Kraken could not be deployed  
 703 on the Intel NUC due to memory limitations, and was run on a 16-core, 128GB RAM high-  
 704 performance computing cluster.

705

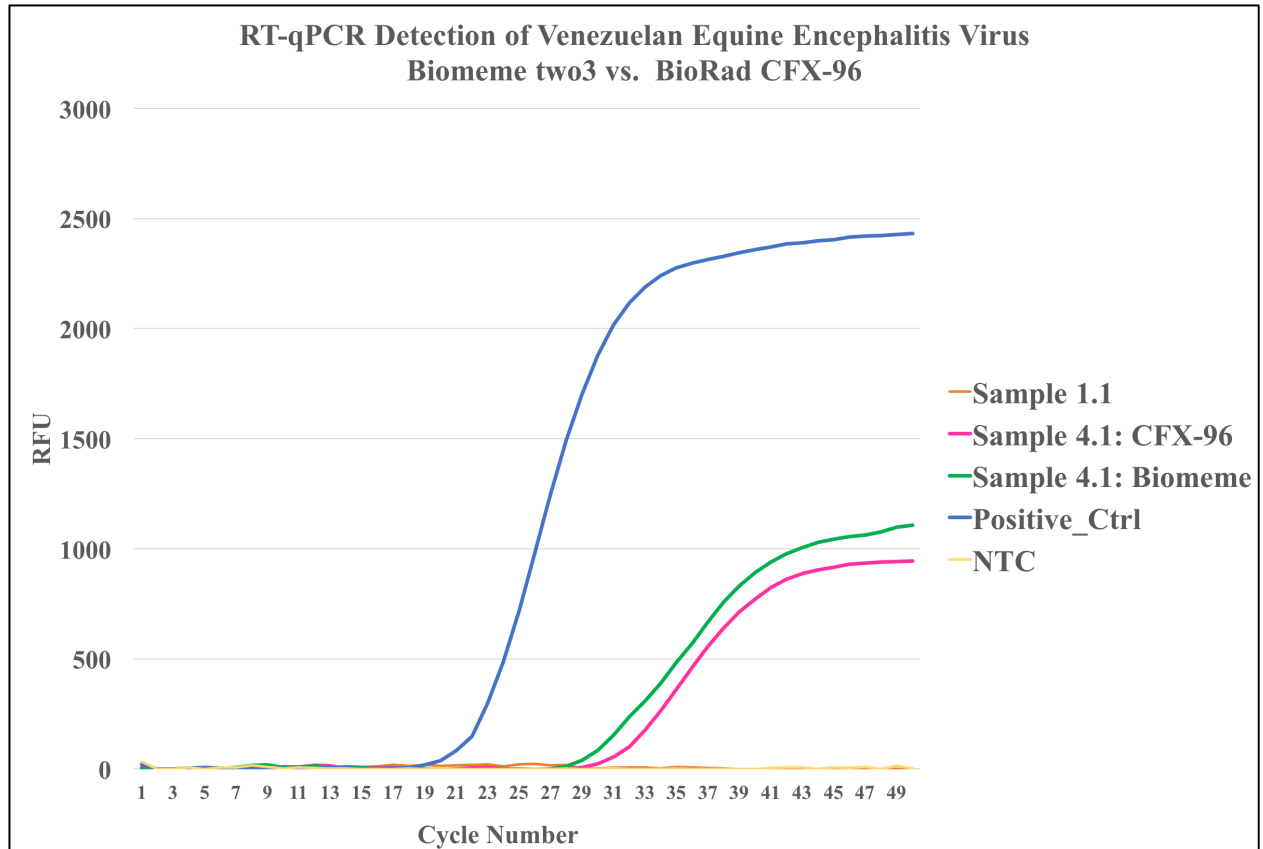

706

707 **Figure 2:** RT-qPCR results from mosquito pool sample 4.1 and 1.1. on the Biomeme two3 hand-  
708 held thermocycler (green line) and the Bio-Rad CFX-96 benchtop thermocycler (pink line) in the  
709 laboratory. Sample 4.1 was positive for VEEV on both platforms; Biomeme  $C_t$  value = 33.92,  
710 CFX-96  $C_t$  value = 30.63. Sample 1.1 was negative for VEEV on both platforms (CFX-96 data  
711 shown). NTC = No Template Control (nuclease-free H<sub>2</sub>O).

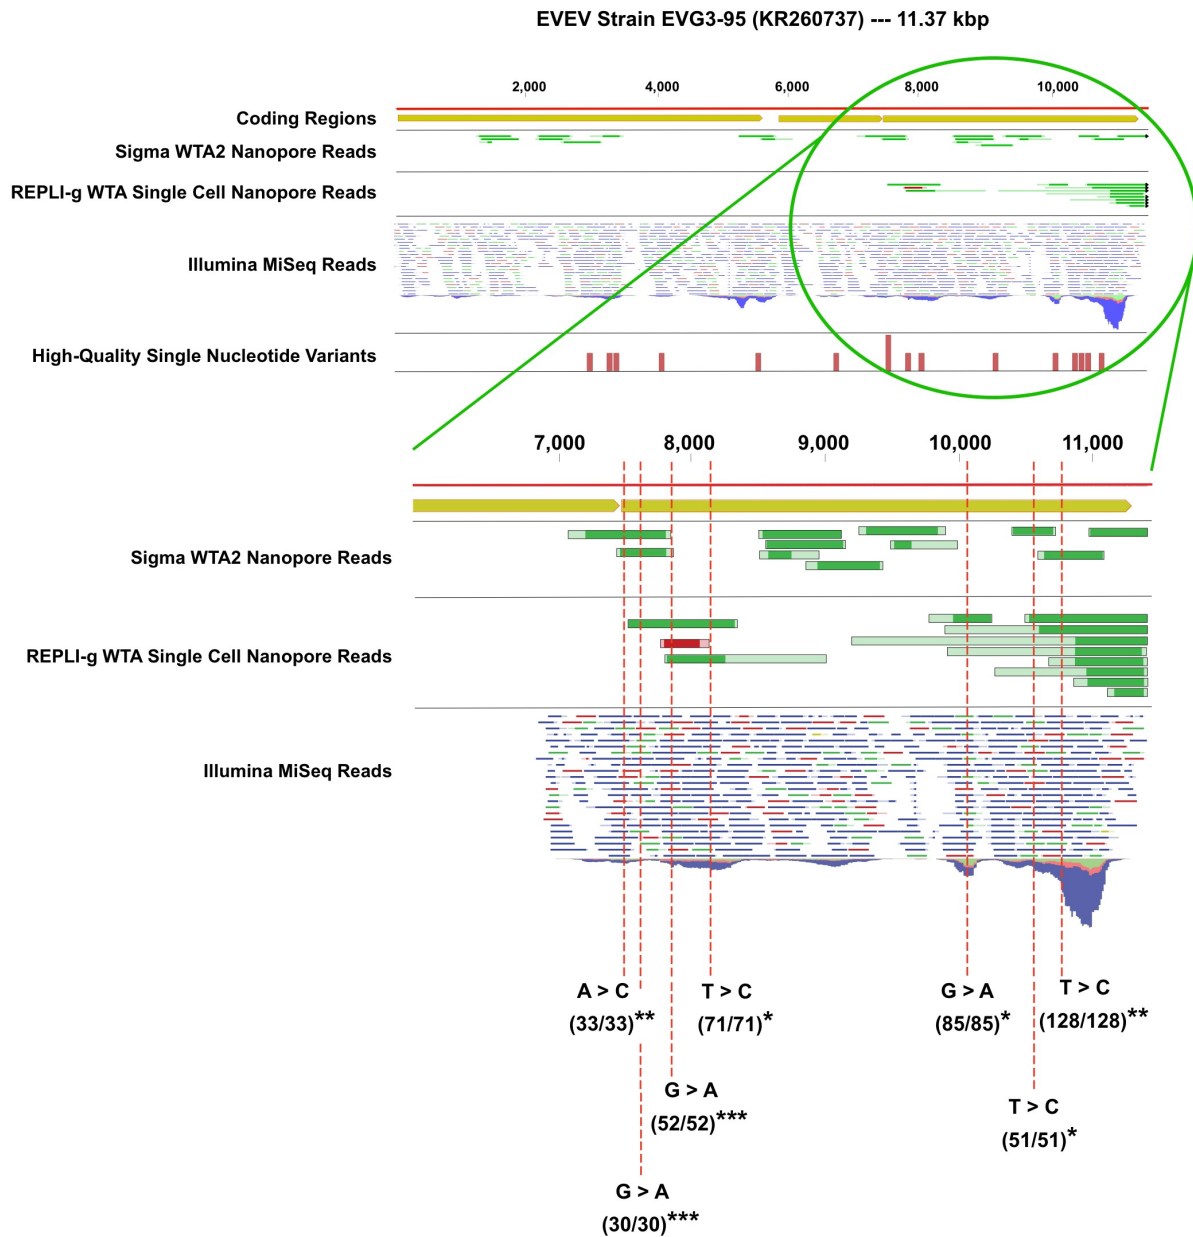

712  
 713 **Figure 3:** Mapping of Illumina reads and MinION nanopore reads generated through Sigma  
 714 WTA2 and Qiagen REPLI-g to Everglades Virus strain EVG3-95. REPLI-g nanopore reads were  
 715 exclusive to the final 4,000 basepairs (5' → 3'), while Sigma nanopore reads were spread across  
 716 the genome. Green shading of reads indicates alignment quality (dark regions align, light regions  
 717 do not), and indicates ligated or otherwise generated chimeras\*. In the region where both sets of  
 718 nanopore reads mapped, 7 out of 10 high-quality variants of 100% frequency detected by  
 719 Illumina sequencing were also detected by nanopore sequencing. Only those variants detected by

720 both Illumina and nanopore sequencing are shown. The ratio in parentheses below each variant is  
721 the ratio of Illumina reads containing the variant to Illumina read coverage at the specific  
722 location. The number of asterisks after the parentheses indicates how many nanopore reads also  
723 contained the same variant.

724



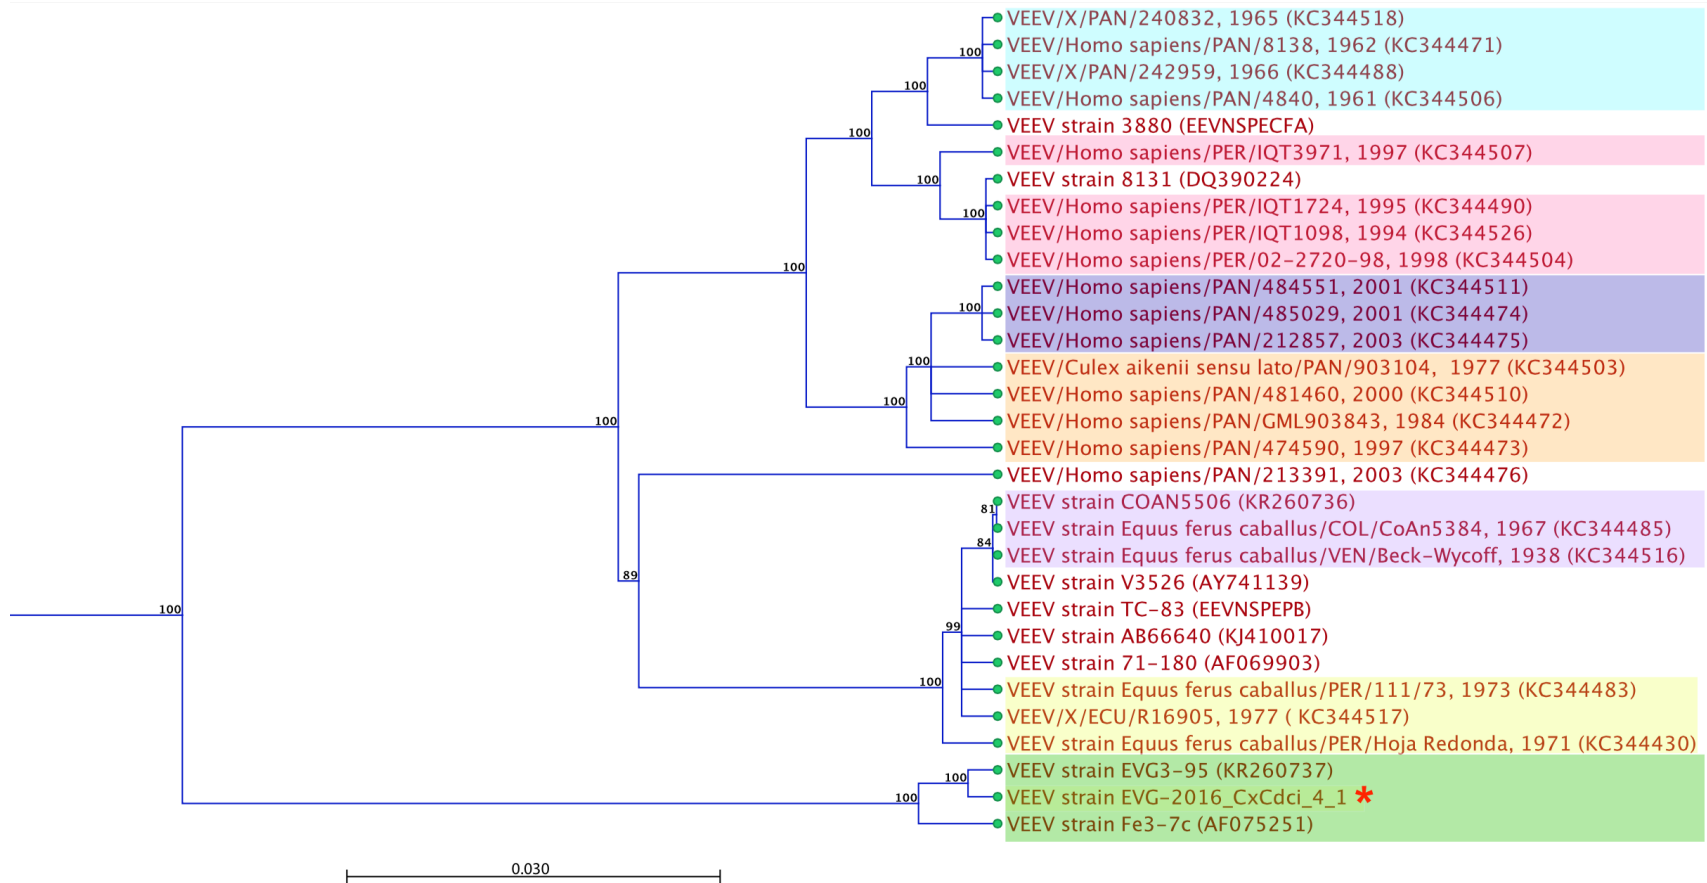

725  
 726 **Figure 4:** Whole genome phylogenetic tree of VEEV and EVEV strains and sub-types. The tree was clustered with the neighbor-  
 727 joining method, invoking the Jukes-Cantor nucleotide substitution model, as implemented by CLC-Genomics Workbench version  
 728 10.0.1. Bootstrap values  $\geq 85$  are shown (1,000 replicates). Scale bar indicates 3% nucleotide sequence divergence. Strains isolated  
 729 from past epizootic events are indicated by colored boxes --- Light blue (1961-1966, Panama), Pink (1994-1998, Peru), Dark blue  
 730 (2001-2003, Panama), Orange (1977, 1984, 1997, 2000, Panama), Light Purple (1938-1967, Colombia/Venezuela), Yellow (1971-

731 1977, Peru/Ecuador). Everglades Virus strains are highlighted in green. The red asterisk (\*) indicates the consensus genome derived  
 732 from KR260737, AF075251, and the Illumina sequencing reads generated in this study, denoted ‘EVG-2016\_CxCdci\_4\_1’.

733 **TABLES**

734

|                              | <b>4.1 Illumina</b> | <b>4.1 Nanopore (REPLI-g)</b> | <b>1.1 Nanopore (REPLI-g)</b> | <b>4.1 Nanopore (Sigma)</b> | <b>1.1 Nanopore (Sigma)</b> |
|------------------------------|---------------------|-------------------------------|-------------------------------|-----------------------------|-----------------------------|
| <b># of sequencing reads</b> | 6,429,832           | 426,580                       | 106,040                       | 212,192                     | 71,355                      |
| <b>Avg. Read Length</b>      | 143                 | 1,403                         | 2,038                         | 957                         | 448                         |
| <b>Max. Read Length</b>      | 151                 | 21,258                        | 61,951                        | 13,207                      | 60,895                      |
| <b>No. of bases (GB)</b>     | 0.86                | 0.6                           | 0.22                          | 0.1                         | 0.32                        |
| <b>Kraken</b>                | 796                 | 1                             | 0                             | 2                           | 0                           |
| <b>Kaiju</b>                 | 2,420               | 10                            | 0                             | 17                          | 1                           |
| <b>Centrifuge</b>            | 1,042               | 2                             | 0                             | 2                           | 0                           |
| <b>LAST*</b>                 | ---                 | 13                            | 1                             | 446                         | 142                         |
| <b>BWA MEM, default*</b>     | 5,269               | 27                            | 0                             | 21                          | 6                           |
| <b>BWA MEM, '-x ont2d'*</b>  | ---                 | 33                            | 0                             | 74                          | 21                          |
| <b>CLC-Genomics*</b>         | 12,680              | ---                           | ---                           | ---                         | ---                         |

735

736 **Table 1:** Sequencing library information and VEEV/EVEV detection information across various analytical tools from both virus-  
 737 positive (4.1) and virus-negative (1.1) samples. Numbers in the rows corresponding to taxonomic analysis tools indicate the number of  
 738 VEEV/EVEV reads detected by that tool from the particular dataset. Asterisks (\*) indicate analysis against a curated database of 144  
 739 VEEV and EVEV genomes, rather than the full RefSeq-sized database of the kmer tools (Kraken, Kaiju, Centrifuge). (GB) = gigabase

740

| <b>Illumina --- BWA-MEM (default)</b>               |                     |                 |                        |       |                                  |                                         |
|-----------------------------------------------------|---------------------|-----------------|------------------------|-------|----------------------------------|-----------------------------------------|
| VEEV Reference<br>Accession No.                     | Reference<br>length | Mapped<br>reads | Non-perfect<br>matches | % GC  | Fraction of<br>reference covered | Total length<br>(zero coverage regions) |
| KR260737                                            | 11370               | 4073            | 2925                   | 49.9  | 0.98                             | 256                                     |
| AF075251                                            | 11395               | 1180            | 882                    | 49.8  | 0.68                             | 3594                                    |
| KC344490                                            | 11418               | 3               | 2                      | 50.23 | 7.44E-03                         | 11333                                   |
| KC344526                                            | 11418               | 3               | 1                      | 50.22 | 9.63E-03                         | 11308                                   |
| KC344471                                            | 11367               | 2               | 2                      | 50.31 | 3.43E-03                         | 11328                                   |
| KC344507                                            | 11135               | 2               | 1                      | 50.18 | 7.63E-03                         | 11050                                   |
| DQ390224                                            | 11412               | 1               | 0                      | 50.19 | 4.73E-03                         | 11358                                   |
| EEVCOMGEN                                           | 11444               | 1               | 1                      | 50.11 | 4.63E-03                         | 11391                                   |
| EEVNSPEPB                                           | 11446               | 1               | 1                      | 49.76 | 7.16E-03                         | 11364                                   |
| KC344475                                            | 11414               | 1               | 1                      | 50.36 | 2.63E-03                         | 11384                                   |
| KC344522                                            | 11412               | 1               | 1                      | 50.10 | 4.38E-03                         | 11362                                   |
| NC_001449                                           | 11444               | 1               | 1                      | 50.11 | 4.63E-03                         | 11391                                   |
| <b>Nanopore (REPLI-g) --- BWA-MEM (-x ont2d)</b>    |                     |                 |                        |       |                                  |                                         |
| VEEV Reference<br>Accession No.                     | Reference<br>length | Mapped<br>reads | Non-perfect<br>matches | % GC  | Fraction of<br>reference covered | Total length<br>(zero coverage regions) |
| KR260737                                            | 11370               | 19              | 19                     | 49.9  | 0.16                             | 9502                                    |
| AF075251                                            | 11395               | 13              | 13                     | 49.8  | 0.1                              | 10263                                   |
| AF075258                                            | 11494               | 1               | 1                      | 48.67 | 5.74E-03                         | 11428                                   |
| <b>Nanopore (Sigma WTA2) --- BWA-MEM (-x ont2d)</b> |                     |                 |                        |       |                                  |                                         |
| VEEV Reference<br>Accession No.                     | Reference<br>length | Mapped<br>reads | Non-perfect<br>matches | % GC  | Fraction of<br>reference covered | Total length<br>(zero coverage regions) |
| KR260736                                            | 11495               | 45              | 45                     | 49.73 | 0.02                             | 11276                                   |
| KR260737                                            | 11370               | 25              | 25                     | 49.9  | 0.55                             | 5147                                    |
| AF075251                                            | 11395               | 4               | 4                      | 49.8  | 0.11                             | 10163                                   |

741

742

743

744

**Table 2:** Illumina and nanopore (REPLI-g vs. Sigma WTA2) read-mapping statistics of BWA-MEM with default settings (Illumina) and nanopore-specific settings (-x ont2d) for MinION data.

745  
746

| Reference Position | Reference | Allele | Count | Coverage | Forward/reverse balance | Detected via Nanopore Sequencing? |
|--------------------|-----------|--------|-------|----------|-------------------------|-----------------------------------|
| 2926               | C         | T      | 43    | 43       | 0.4                     | NO                                |
| 3268               | C         | T      | 53    | 53       | 0.37                    | YES                               |
| 3365               | C         | T      | 49    | 49       | 0.5                     | YES                               |
| 4063               | G         | A      | 33    | 33       | 0.46                    | NO                                |
| 5521               | T         | C      | 54    | 54       | 0.42                    | YES                               |
| 6718               | C         | T      | 36    | 36       | 0.44                    | NO                                |
| 7534               | A         | C      | 33    | 33       | 0.45                    | YES                               |
| 7584               | G         | A      | 30    | 30       | 0.38                    | YES                               |
| 7900               | G         | A      | 52    | 52       | 0.43                    | YES                               |
| 8094               | T         | C      | 71    | 71       | 0.49                    | YES                               |
| 9147               | C         | T      | 49    | 49       | 0.49                    | NO                                |
| 10032              | G         | A      | 85    | 85       | 0.42                    | YES                               |
| 10317              | G         | A      | 32    | 32       | 0.43                    | NO                                |
| 10425              | C         | T      | 57    | 57       | 0.43                    | NO                                |
| 10539              | T         | C      | 51    | 51       | 0.4                     | YES                               |
| 10731              | T         | C      | 128   | 128      | 0.49                    | YES                               |

747  
748

**Table 3:** Metrics of high-quality (read count with variant / read coverage = 1 at given reference position) single nucleotide variants (SNVs) detected across the Everglades Virus strain EVG3-95 (KR260737) genome via Illumina MiSeq sequencing of virus-positive mosquito pool sample 4.1. 10 out of 16 SNVs (~62%) were detected via MinION reads.

751  
752  
753  
754

## 755 **Supplementary Material:**

756

### 757 *Taxonomy-caller parameters*

758

759 -----LAST-----

760 \$ lastdb -Q 0 VEEV\_reference\_genomes VEEV\_reference\_genomes.fasta

761 \$ lastal -s 2 -T 0 -a 1 -Q 1 -f BlastTab VEEV\_reference\_genomes data.fastq > data\_alns.maf

762 \$ grep "^[^#;]" data\_alns.maf | awk -F '\t' '{print \$1}' | sort | uniq -c | sort -nr | wc -l

763

764 -----BWA-MEM-----

765 \$ bwa index VEEV\_reference\_genomes.fasta

766 \$ bwa mem -x ont2d VEEV\_reference\_genomes.fasta data.fastq > data.sam

767 \$ samtools view -bS data.sam > data.bam

768 \$ samtools sort data.bam -o data\_sorted.bam

769 \$ samtools view -F 260 data\_sorted.bam | cut -f 3 | sort | uniq -c | awk '{printf("%s\t%s\n", \$2,

770 \$1)}' > counts.txt

771

772 -----CENTRIFUGE-----

773 set -xeu

774 /src/centrifuge/centrifuge -x /src/centrifuge/indices/phv -U data.fastq -S data.out -p 16 --met-

775 stderr

776

777 -----KRAKEN-----

778 /home/bin/kraken \

779 --preload \

780 --db /home/src/kraken/full \

781 --fastq-input \

782 --threads 16 \

783 --classified-out ./\$DATA-class.fa \

784 --unclassified-out ./\$DATA-unclass.fa \

785 --output ./\$DATA-krakenout.txt \

786 data.fastq

787 kraken-report --db /home/src/kraken/full ./\$DATA-krakenout.txt > ./\$DATA-kreport.txt

788 kraken-mpa-report --db /home/src/kraken/full ./\$DATA-krakenout.txt > ./\$DATA-mpkraken.txt;

789

790 -----KAIJU-----

791 set -xeu

792

793 kaiju -t /home/src/kaiju/bin/kaijudb/nodes.dmp -f /home/src/kaiju/bin/kaijudb/kaiju\_db.fmi -i

794 data.fastq -o ./data.kaiju.out -v -z 16 -a greedy -e 10 -s 35

795

796 addTaxonNames -t /home/src/kaiju/bin/kaijudb/nodes.dmp -n /home/src/

797 kaiju/bin/kaijudb/names.dmp -i ./data.kaiju.out -o ./data.kaiju-names.out

798

799 kaijuReport -t /home/src/kaiju/bin/kaijudb/nodes.dmp -n /home/src/kaiju/bin/kaijudb/names.dmp

800 -i ./data.kaiju.out -r species -o ./data.kaiju-names.out.summary

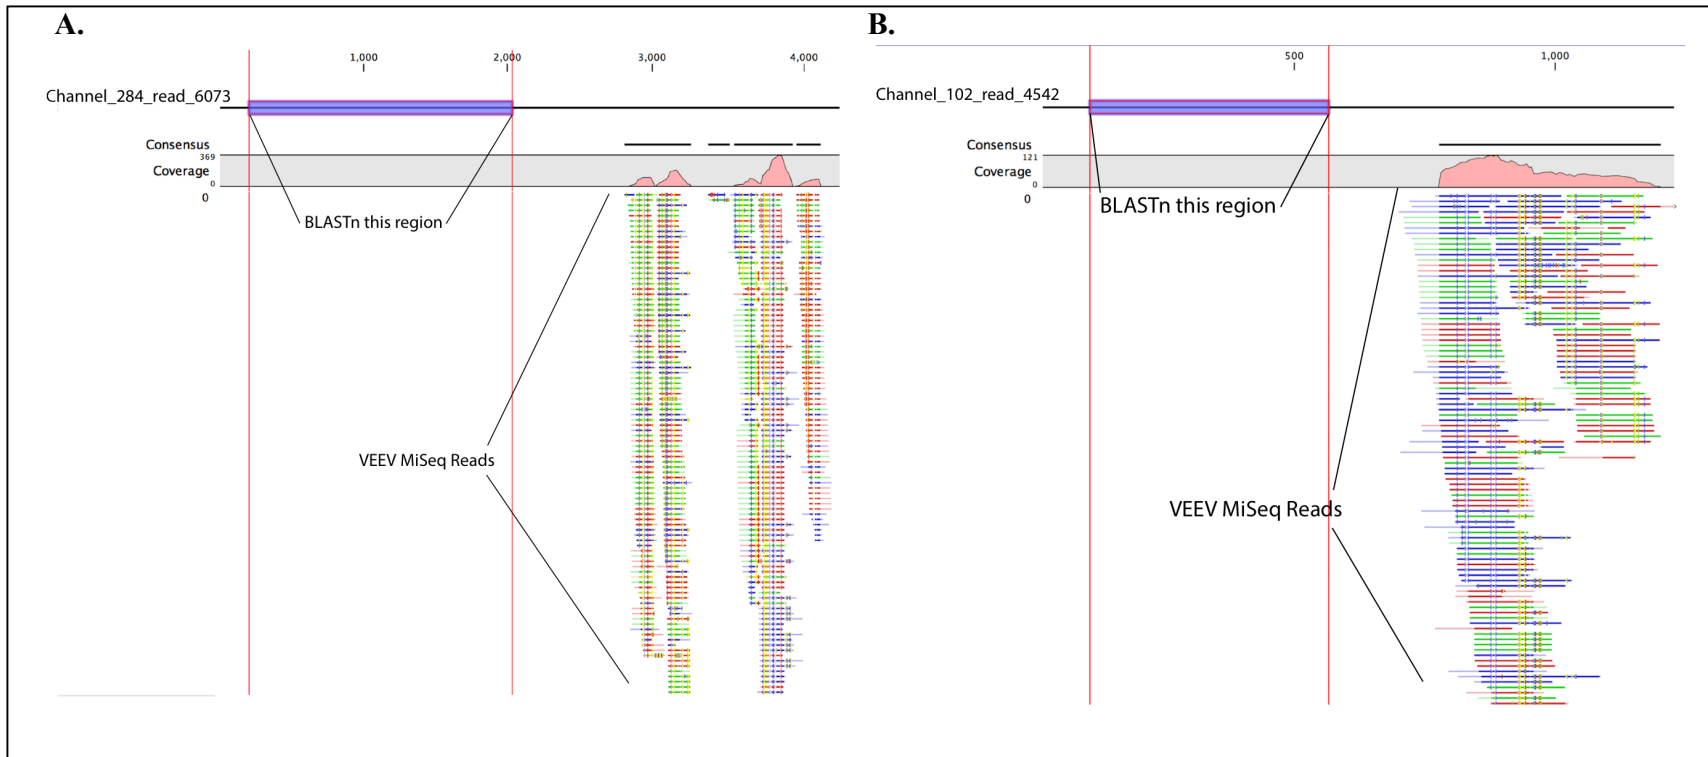

801  
802  
803  
804  
805  
806  
807  
808  
809  
810  
811  
812  
813

**Supplementary Figure 1:** Two examples of chimeric REPLI-g generated nanopore reads from virus-positive mosquito pool sample 4.1. Illumina MiSeq reads that mapped to any strain in the custom VEEV database were isolated and re-mapped to REPLI-g generated nanopore reads that also aligned to VEEV references in CLC-Bio Genomics Workbench v. 10.0.1. One would expect generally uniform distribution of re-mapped MiSeq reads across VEEV-associated nanopore reads. However, MiSeq reads are observed to align with specific regions of nanopore reads, and are absent from other regions, indicating chimerism in REPLI-g generated nanopore reads. **(A)** The purple-highlighted region of Channel\_284\_read\_6073 was BLASTed against the nt database and the highest associated hits were for the mosquito *Culex quinquefasciatus* and *Drosophila* spp. **(B)** The purple highlighted region of Channel\_102\_read\_4542 returned *Culex quinquefasciatus* and *Aedes aegypti* as top hits in its BLAST result.



814 **List of Suggested Hardware and Consumables for Field-Forward Agnostic Nanopore**  
815 **Sequencing for the Purposes of Environmental Biosurveillance -----**

- 816  
817 **1)** *the Biomeme Bulk Nucleic Acid Extraction kit provides individually wrapped packets*  
818 *containing all plastic-ware needed for each sample (syringe assembly, tubing, plastic*  
819 *pestle, 2 ml elution tube) and 4 reagent bottles (2 x 15 ml, 2 x 30 ml)*  
820 **2)** *the Biomeme two3 thermocycler (or other portable thermocycler: e.g., MIC, miniPCR,*  
821 *etc.) and accompanying 0.2 ml RT-qPCR tubes with lyophilized assays*  
822 **3)** *the MinION nanopore sequencing device*  
823 **4)** *required number of R9.4 flowcells*  
824 **5)** *ONT sequencing library preparation kit (SQK-LSK108) and flow cell wash kit (EXP-*  
825 *WSH002), and associated reagents*  
826 **6)** *GeneRead rRNA Depletion Kit*  
827 **7)** *Sigma WTA2 Whole Transcriptome Amplification Kit*  
828 **8)** *50 ml conical tube filled with 70% EtOH (1). 50 ml conical tube filled with 100%*  
829 *EtOH (1). 50 ml conical tube of molecular grade H<sub>2</sub>O (1).*  
830 **9)** *mini centrifuge*  
831 **10)** *P1000, P200, P20, P10 pipetman and tip boxes*  
832 **11)** *magnetic tube stand*  
833 **12)** *AMPure and Streptavidin beads (2 x 5 ml bottles)*  
834 **13)** *Intel NUC Skull Canyon (32GB RAM, up to 2TB SSD, hyper-threaded quad-core,*  
835 *Ubuntu 16.04 LTS) and Bluetooth monitor/keyboard/trackpad*

836  
837  
838  
839  
840  
841  
842  
843  
844  
845

846 **List of VEEV Reference Genome Accession Numbers from Targeted Read-Mapping**  
847 **Database -----**  
848

|          |            |          |          |          |          |           |          |
|----------|------------|----------|----------|----------|----------|-----------|----------|
| AF004458 | AY741139   | KC344441 | KC344461 | KC344481 | KC344501 | KC344521  | VEU55347 |
| AF004459 | AY823299   | KC344442 | KC344462 | KC344482 | KC344502 | KC344522  | VEU55350 |
| AF004472 | DQ390224   | KC344443 | KC344463 | KC344483 | KC344503 | KC344523  | VEU55360 |
| AF069903 | EEVCOMGEN  | KC344444 | KC344464 | KC344484 | KC344504 | KC344524  | VEU55362 |
| AF075251 | EEVNSPECFA | KC344445 | KC344465 | KC344485 | KC344505 | KC344525  |          |
| AF075252 | EEVNSPENV  | KC344446 | KC344466 | KC344486 | KC344506 | KC344526  |          |
| AF075253 | EEVNSPEPA  | KC344447 | KC344467 | KC344487 | KC344507 | KC344527  |          |
| AF075254 | EEVNSPEPB  | KC344448 | KC344468 | KC344488 | KC344508 | KC344528  |          |
| AF075255 | KC344429   | KC344449 | KC344469 | KC344489 | KC344509 | KC344529  |          |
| AF075256 | KC344430   | KC344450 | KC344470 | KC344490 | KC344510 | KC344530  |          |
| AF075257 | KC344431   | KC344451 | KC344471 | KC344491 | KC344511 | KC344531  |          |
| AF075258 | KC344432   | KC344452 | KC344472 | KC344492 | KC344512 | KF985959  |          |
| AF075259 | KC344433   | KC344453 | KC344473 | KC344493 | KC344513 | KJ410017  |          |
| AF100566 | KC344434   | KC344454 | KC344474 | KC344494 | KC344514 | KP282671  |          |
| AF375051 | KC344435   | KC344455 | KC344475 | KC344495 | KC344515 | KR260736  |          |
| AF448535 | KC344436   | KC344456 | KC344476 | KC344496 | KC344516 | KR260737  |          |
| AF448536 | KC344437   | KC344457 | KC344477 | KC344497 | KC344517 | NC_001449 |          |
| AF448537 | KC344438   | KC344458 | KC344478 | KC344498 | KC344518 | VEU34999  |          |
| AF448538 | KC344439   | KC344459 | KC344479 | KC344499 | KC344519 | VEU55342  |          |
| AF448539 | KC344440   | KC344460 | KC344480 | KC344500 | KC344520 | VEU55345  |          |

849
